# Supplementary material for: The diversity of gendered adaptation strategies to climate change of Indian farmers: A feminist intersectional approach
Source: Springer Nature journal article supplement (doi:10.1007/s13280-016-0833-2), 2016-11-22
Supplement: MOESM1 [file 15654672]

***Ambio***

Electronic Supplementary Material

Title: **The diversity of gendered adaptation strategies to climate change of Indian farmers: A feminist intersectional approach**

Authors: Federica Ravera, Berta Martín-López, Unai Pascual, Adam Drucker

## Supplementary material 1

List of variables selected from recent literature to be used in the Canonical Correspondence Analyses (CCA) as explanatory factors, determining the adoption of different adaptive strategies. Note: to reduce heteroscedasticity, continuous variables were transformed into  $\ln(x+1)$ .

| Variables                                 | Literature                                                                                                             | Description /measure                                                                                              | UK<br>(N=135) | Bihar<br>(N=176) |
|-------------------------------------------|------------------------------------------------------------------------------------------------------------------------|-------------------------------------------------------------------------------------------------------------------|---------------|------------------|
| <b><i>Gender variables</i></b>            |                                                                                                                        |                                                                                                                   |               |                  |
| Gender bias of respondent                 | Acquah-deGraf and Onumah (2011); Below et al. 2012; Fosu-Mensah et al. (2012);                                         | Female respondent (Dummy, takes the value of 1 if respondent is female) (% HH =1)                                 | 51%           | 41%              |
| Gendered decision making                  | Huynh and Resurreccion (2014); Opiyo et al. (2015); Ray-Bennett (2009); Sofoluwe et al. (2011); Deressa et al. (2008); | Decision making in agriculture is controlled by women (dummy, takes the value of 1 if there is control) (% HH =1) | 42%           | 30%              |
| Gendered task involvement*                | Gbetibouo et al. (2010)                                                                                                | Main involvement of women in tasks of agriculture (dummy, takes the value of 1 if there is involvement) (% HH =1) | 59%           | 37%              |
| <b><i>Intersectional HH variables</i></b> |                                                                                                                        |                                                                                                                   |               |                  |
| HH size                                   | Deressa et al. (2008, 2011); Opiyo et al. (2015); Sofoluwe et al. (2011)                                               | Number of people in the house (n <sup>o</sup> )<br>Mean (SD)                                                      | 6.7 (2.9)     | 9.7 (4.6)        |

| <b>Variables</b>                                          | <b>Literature</b>                                                                                                                                                             | <b>Description /measure</b>                                                     | <b>UK</b><br>(N=135)             | <b>Bihar</b><br>(N=176)          |
|-----------------------------------------------------------|-------------------------------------------------------------------------------------------------------------------------------------------------------------------------------|---------------------------------------------------------------------------------|----------------------------------|----------------------------------|
| Schooling                                                 | Acquah-deGraf and Onumah (2011); Apata et al. (2009) ; Deressa et al. (2011) ; García de Jalón et al. (2015); Below et al. 2012; Opiyo et al. (2015); Gbetibouo et al. (2010) | Years in school completed by HH head (n <sup>o</sup> )<br>Mean (SD)             | 2.9 (1.5)                        | 2.5 (1.4)                        |
| Age                                                       | Acquah-deGraf and Onumah (2011); Deressa et al. (2008); García de Jalón et al. 2015; Hisali et al (2011) ; Below et al. (2012)                                                | Age HH head (years)<br>Mean (SD)                                                | 50 (15.6)                        | 46 (14.9)                        |
| Caste / Social class                                      | Onta and Resurreccion (2011); Huynh and Resurreccion (2014); Ray-Bennett (2009)                                                                                               | Respondent belong from different caste (ordinal from low=1 to high=3) (% HH )   | Low=6%<br>Medium=79%<br>High=15% | Low=3%<br>Medium=20%<br>High=76% |
| <b><i>Social capital</i></b>                              |                                                                                                                                                                               |                                                                                 |                                  |                                  |
| Participation in agricultural extension/training programs | Below et al. (2012); Gbetibouo et al. (2010)                                                                                                                                  | Participation (Dummy, takes the value of 1 if there is participation) (% HH =1) | 46%                              | 38%                              |

| <b>Variables</b>                                | <b>Literature</b>                                                                                                                                            | <b>Description /measure</b>                                                     | <b>UK<br/>(N=135)</b>                                                                                          | <b>Bihar<br/>(N=176)</b>                                                                                       |
|-------------------------------------------------|--------------------------------------------------------------------------------------------------------------------------------------------------------------|---------------------------------------------------------------------------------|----------------------------------------------------------------------------------------------------------------|----------------------------------------------------------------------------------------------------------------|
| Participation in informal networks/institutions | Below et al. (2012)                                                                                                                                          | Participation (Dummy, takes the value of 1 if there is participation) (% HH =1) | 51%                                                                                                            | 5%                                                                                                             |
| <b><i>Access to assets (wealth)</i></b>         |                                                                                                                                                              |                                                                                 |                                                                                                                |                                                                                                                |
| Land access                                     | Acquah-deGraf and Onumah (2011); Below et al. (2012); Fosu-Mensah et al. (2012); García de Jalón et al. (2015); Hisali et al (2011); Gbetibouo et al. (2010) | Cultivated land (own and rented land) (ha)<br>Mean (SD)                         | 0.4 ( 0.7)                                                                                                     | 1.4 (1.9)                                                                                                      |
|                                                 |                                                                                                                                                              | Land ownership categories (% HH)                                                | Landless=1,6%<br>Small farmers (<0.4 ha) =72%<br>Medium Farmers (0.4-1.2) =21.4%<br>Large farmers (>1.2 ha)=5% | Landless=6.7%<br>Small farmers (<0.5 ha) =33.5%<br>medium farmers (0.5-2) =42.8%<br>Large farmers (>2 ha) =17% |
| Animals access                                  | Deressa et al. (2011); García de Jalón et al. 2015; Opiyo et al. (2015); Sofoluwe et al. (2011)                                                              | Total number of animals owned (nº)<br>Mean (SD)                                 | 4.0 (3.1)                                                                                                      | 1.8 (1.5)                                                                                                      |

| <b>Variables</b>                | <b>Literature</b>                                                                                                                                 | <b>Description /measure</b>                                               | <b>UK</b><br>(N=135)     | <b>Bihar</b><br>(N=176)   |
|---------------------------------|---------------------------------------------------------------------------------------------------------------------------------------------------|---------------------------------------------------------------------------|--------------------------|---------------------------|
| Access to information           | de Wit (2006); García de Jalón et al. 2015 ; Hisali et al (2011)                                                                                  | Level of access to information (from high=4 to null=0)                    | 1.9 (0.6)                | 1.6 (0.8)                 |
| Access to irrigation            | de Wit (2006); Deressa et al. (2011); Gbetibouo et al. (2010)                                                                                     | Level of access to irrigation (from high=4 to null=0)                     | 0.4 (0.7)                | 1.8 (0.6)                 |
| Access to credit                | Deressa et al. 2008; de Wit (2006); Fosu-Mensah et al. (2012); Hisali et al (2011)                                                                | Access to credit (Dummy takes the value of 1 if there is access; % HH =1) | 40%                      | 39 %                      |
| Off-farm income diversification | Acquah-deGraf and Onumah (2011); Nielsen and Reenberg (2010); Sofoluwe et al. (2011); García de Jalón et al. 2015 ; Nhemachena and Hassan (2008); | Number of off farm activities income-generating (n <sup>o</sup> )         | 2.6 (1.4)                | 1.8 (1.1)                 |
| On-farm income diversification  |                                                                                                                                                   | Number of on-farm activities mainly oriented to market (n <sup>o</sup> )  | 1.0 (1.2)                | 1.9 (1.6)                 |
| <b><i>Farm location</i></b>     |                                                                                                                                                   |                                                                           |                          |                           |
| Distance to market place        | Below et al. (2012); Garcia de Jalon et al. (2014)                                                                                                | Distance to close (farmers') markets (Km)                                 | 4.7 ( 4.0)               | 4.0 ( 1.4)                |
|                                 |                                                                                                                                                   | Distance to town markets (Km)                                             | 39.4 (3.0)               | 21.0 (4.7)                |
| Location (site)                 | Below et al. (2012); García de Jalón et al. (2015) ; Gbetibouo et al. (2010)                                                                      | Agro-ecological zone (% HH in site 1 and % HH 2)                          | Site 1=70%<br>Site 2=30% | Site 1=56%<br>Site 2=44 % |

| Variables                                                                 | Literature                                | Description /measure                                                                                                                                                                                                                                                              | UK<br>(N=135) | Bihar<br>(N=176) |
|---------------------------------------------------------------------------|-------------------------------------------|-----------------------------------------------------------------------------------------------------------------------------------------------------------------------------------------------------------------------------------------------------------------------------------|---------------|------------------|
| <b>Perceptions of change</b>                                              |                                           |                                                                                                                                                                                                                                                                                   |               |                  |
| Perception of climate change drivers                                      | Below et al.(2012); Gandure et al. (2013) | Number of weather related changes (T, rainfall etc.) perceived by a household within the last decade: $P_{ij} = \sum i(n)_j$ with:<br><i>P<sub>ij</sub> = Number of perceived changes by jth household</i><br><i>i...m = Changes of weather parameters</i><br>Mean (SD)           | 4.0 (1.1)     | 2.9 (2.0)        |
| Perception of multiple drivers of change (including environmental change) |                                           | Number of changes (socio-cultural, economic, political, environmental) perceived by a household within the last decade: $P_{ij} = \sum i(n)_j$ with:<br><i>P<sub>ij</sub> = Number of perceived changes by jth household</i><br><i>i...m = Changes of parameters</i><br>Mean (SD) | 9.7 (2.5)     | 8.8 (3.8)        |

\* We developed the following categories of gender tasks division of work: “tasks mainly managed by men” (when more than 5 tasks over 9 were managed and controlled by men of the family), “tasks mainly managed by women” (more than 5 tasks over 9 were managed and controlled by women of the family), “tasks with shared management” (when tasks were managed and controlled by both men and women). In a few number of cases where less than five tasks had been identified as managed by one category, we assigned the more cited category.

## Supplementary material 2

Social perceptions of main drivers, impacts and strategies adopted. Note: number of strategies is defined in Figure 2.

| <b>Drivers</b>                                                                                                                                                                                                          | <b>Main impacts (% respondents)</b>                                                                                                                                                                                                                                                                                             | <b>Strategies adopted</b>                                                                                                                                                       |
|-------------------------------------------------------------------------------------------------------------------------------------------------------------------------------------------------------------------------|---------------------------------------------------------------------------------------------------------------------------------------------------------------------------------------------------------------------------------------------------------------------------------------------------------------------------------|---------------------------------------------------------------------------------------------------------------------------------------------------------------------------------|
| <b><i>Uttarakhand</i></b>                                                                                                                                                                                               |                                                                                                                                                                                                                                                                                                                                 |                                                                                                                                                                                 |
| <i>Climate change</i><br>[increased temperature; more frequent droughts; later start of rains; uncertainty of climatic events and erratic monsoon; less overall rainfall; spring water changes; decreasing on snowfall] | Woman moves far away for NR (e.g. water, fuelwood) (82%)<br>Yield decline due to climatic stress (67%)<br>Woman works more in the field (57%)<br>Food availability decrease (47%)<br>Pest and diseases (41%)<br>Change in growing season (12%)<br>Loss of species/varieties (7%)<br>Cropping change (7%)                        | Socio-economic and cultural (4, 7, 8, 10, 11, 12, 13, 15, 16, 17) /<br>Ecosystem-based (18, 20, 21, 23, 24, 25, 26, 27, 28, 29, 30, 32, 34) /<br>Technological (35, 37, 38, 39) |
| <i>Land use change and environmental changes</i>                                                                                                                                                                        | Soil degradation and yield decline (91%)<br>Woman moves far away for NR (e.g. water, fuelwood) (82%)<br>Loss of forest cover (76%)<br>Decreasing availability of fuel wood and other NWFP (42%)<br>Land fragmentation (35%)<br>Wildlife movement near to villages due to forest loss (6%)<br>Decreasing pasture and fodder (6%) | Socio-economic and cultural (1, 4, 6, 10, 11, 12, 15, 17) /<br>Ecosystem-based (20, 21, 23, 28, 30, 31, 32) /<br>Technological (35, 36, 37, 39)                                 |
| <i>Political and economic change</i>                                                                                                                                                                                    | High price of food and dependence from external                                                                                                                                                                                                                                                                                 | Socio-economic and cultural (1, 3, 4, 5,                                                                                                                                        |

| <b>Drivers</b>                                                                                                                                                                                                   | <b>Main impacts (% respondents)</b>                                                                                                                                                                                                                                                                                                                           | <b>Strategies adopted</b>                                                                                                                                                |
|------------------------------------------------------------------------------------------------------------------------------------------------------------------------------------------------------------------|---------------------------------------------------------------------------------------------------------------------------------------------------------------------------------------------------------------------------------------------------------------------------------------------------------------------------------------------------------------|--------------------------------------------------------------------------------------------------------------------------------------------------------------------------|
|                                                                                                                                                                                                                  | intervention (76%)<br>Woman works more in the field (57%)<br>Out-migration and less labor force availability (46%)<br>Increasing external interventions in seed and agriculture management(40%)                                                                                                                                                               | 6, 7, 8, 9, 10, 11, 12, 15) /<br>Ecosystem-based (18, 19, 33) /<br>Technological (36)                                                                                    |
| <i>Cultural Changes</i>                                                                                                                                                                                          | Changes of customs, habits etc. (71%)<br>Changing woman/man relations and expectations young people (46%)<br>Less leadership in the village (16%)<br>More willingness with environmental issues (10%)                                                                                                                                                         | Socio-economic and cultural (3, 9, 10, 11, 12, 15, 17) /<br>Ecosystem-based (18) /<br>Technological (-)                                                                  |
| <b>Bihar</b>                                                                                                                                                                                                     |                                                                                                                                                                                                                                                                                                                                                               |                                                                                                                                                                          |
| <i>Climate change</i><br>[increased temperature; later start of rains; uncertainty of climatic events and erratic monsoon; less overall rainfall; lower groundwater table; more frequent droughts; strong winds] | Woman works more in the field (60%)<br>Yield decline due to climatic stress (43%)<br>No changes in woman role/decision making (32%)<br>Pest and diseases (26%)<br>Change in growing season (14%)<br>Woman moves far away for NR (13%)<br>Land use and cropping change (12%)<br>Food availability decrease/food crisis (10%)<br>Loss of species/varieties (5%) | Socio-economic and cultural (1, 2, 4, 7, 8, 9, 10, 12, 14, 16, 17) /<br>Ecosystem-based (20, 21, 22, 23, 24, 25, 26, 28, 29, 30, 33) /<br>Technological (36, 37, 38, 39) |
| <i>Land use and environmental changes</i>                                                                                                                                                                        | Increasing yield due to technological advances (71%)<br>Land fragmentation/access to cultivated land (51%)<br>Soil degradation and yield decline (14%)<br>Woman moves far away for NR (13%)                                                                                                                                                                   | Socio-economic and cultural (1, 2, 4, 6, 12) /<br>Ecosystem-based (19, 20, 21, 22, 23, 28, 30, 31, 32, 33) /<br>Technological (35, 36, 37)                               |



| <b>Drivers</b>                       | <b>Main impacts (% respondents)</b>                                                                                                                                                                                                                                                                                                                                                                                                                                                     | <b>Strategies adopted</b>                                                                                                                            |
|--------------------------------------|-----------------------------------------------------------------------------------------------------------------------------------------------------------------------------------------------------------------------------------------------------------------------------------------------------------------------------------------------------------------------------------------------------------------------------------------------------------------------------------------|------------------------------------------------------------------------------------------------------------------------------------------------------|
| <i>Political and economic change</i> | <p>Out-migration and less labor force availability (92%)</p> <p>Increasing external interventions (NGOs and governmental) in seed/agriculture management (64%)</p> <p>Woman works more in the field (60%)</p> <p>High price of food, inputs, irrigation and seed (and associated corruption and risk on quality of seed) (30%)</p> <p>New policy of seeds: dependence from external sources, (20%)</p> <p>New opportunity to sell (15%)</p> <p>Increasing control /monitoring (11%)</p> | <p>Socio-economic and cultural (1, 2, 3, 4, 5, 6, 7, 8, 9, 10, 15, 16, 17) /</p> <p>Ecosystem-based (19, 29) /</p> <p>Technological (35, 38, 39)</p> |
| <i>Cultural Changes</i>              | <p>Changing patterns of woman/man relations (64%)</p> <p>Changes of customs (46%)</p> <p>No changes in woman role/decision making (32%)</p> <p>More willingness with environmental issues (30%)</p> <p>Less leadership in the village (19%)</p>                                                                                                                                                                                                                                         | <p>Socio-economic and cultural (3, 9, 10, 11, 12, 15) /</p> <p>Ecosystem-based (-) /</p> <p>Technological (-)</p>                                    |
